# Supplementary material
Source: Springer Nature journal article supplement (https://www.springermedizin.de/resource/supplementary/12916_2013_826_MOESM3_ESM.pdf/9598372)
Supplement: MOESM3 [file 9598372]

| Reference (pubmed id)                                    | Sample Type                                                   | Genetics/ Genomics Platform                    | Clinical Settings                                                                                                                                                       | Key Findings                                                                                                                                                                                    |
|----------------------------------------------------------|---------------------------------------------------------------|------------------------------------------------|-------------------------------------------------------------------------------------------------------------------------------------------------------------------------|-------------------------------------------------------------------------------------------------------------------------------------------------------------------------------------------------|
| <b>a) Epigenetic Biomarkers</b>                          |                                                               |                                                |                                                                                                                                                                         |                                                                                                                                                                                                 |
| Belinsky SA<br>PNAS<br>1998 [59]<br>(9751761)            | Sputum, lung tissue, biopsies                                 | Methylation-specific PCR (MSP)                 | Lung tissue, precursor lesions and bronchial biopsies from squamous cell carcinoma (SCC) patients and sputum from individuals with suspicion of lung cancer             | CDKN2A hypermethylation more often observed in cancer patients than no cancer patients                                                                                                          |
| Esteller M<br>Cancer Res<br>1999 [66]<br>(9892187)       | Paired serum and lung tissue                                  | MSP                                            | Lung tissue and serum from patients with non-small cell lung cancer (NSCLC) and control                                                                                 | 73% of patients had serum DNA that reflected aberrant methylation in their tumors, specifically in CDKN2A, MGMT, DAPK, GSTP1                                                                    |
| Palmisano WA<br>Cancer Res<br>2000 [60]<br>(11085511)    | Paired sputum and lung tissue                                 | MSP                                            | Lung tissue and sputum from smokers with SCC                                                                                                                            | CDKN2A and MGMT were hypermethylated in both sputum and tumor of patients at time of diagnosis                                                                                                  |
| Russo AL<br>Clin Cancer Res<br>2005 [72]<br>(15814621)   | Bronchial epithelial cells, blood lymphocytes, lung tissue    | MSP                                            | Paired blood and bronchial epithelial samples from smokers/non-smokers with preneoplastic lesions and neoplastic lesions from individuals with NSCLC versus controls    | ECAD and DAPK more likely to be methylated in smoker's peripheral lymphocytes or bronchial epithelium and never methylated in non-smokers                                                       |
| Wang L<br>Thorac Oncol<br>2010 [58]<br>(20421821)        | Peripheral blood leukocytes                                   | Illumina Beadchip and Pyrosequencing           | Smokers with recently diagnosed small cell lung cancer (SCLC) and controls                                                                                              | 43 CpG sites were differentially methylated between SCLC and controls, and 9 of these, validated by pyrosequencing, could discriminate SCLC with AUC of 0.86                                    |
| Begum S<br>Clin Cancer Res<br>2011 [71]<br>(21610147)    | Paired serum and lung tissue                                  | MSP                                            | Paired serum and lung tissue samples from individuals with lung cancer and controls                                                                                     | 6 gene serum panel that discriminated lung cancer patients with 75% sensitivity and 73% specificity                                                                                             |
| <b>b) Transcriptomics Biomarkers</b>                     |                                                               |                                                |                                                                                                                                                                         |                                                                                                                                                                                                 |
| Spira A<br>Nat Med<br>2007 [76]<br>(17334370)            | Bronchial brushings, large airway epithelium                  | Affymetrix array                               | Bronchial brushings of cytologically normal large airway epithelium obtained from smokers undergoing bronchoscopy for suspicion of lung cancer                          | 80 gene airway biomarker with >80% diagnostic sensitivity and specificity, and 95% sensitivity and NPV when biomarker is combined with cytology collected at bronchoscopy                       |
| Blomquist T<br>Canc Res<br>2009 [78]<br>(19887610)       | Bronchial brushings, airway normal bronchial epithelial cells | (StarT)-PCR                                    | Normal bronchial epithelial cells of lung cancer cases and non-lung cancer controls                                                                                     | 14 gene airway biomarker of antioxidant, DNA repair and transcription factor genes with performance in a test AUC>0.84 and an accuracy of 80%.                                                  |
| Showe MK<br>Can Res<br>2009 [86]<br>(1951989)            | Peripheral blood mononuclear cells                            | cDNA array                                     | Blood collection from smokers with newly diagnosed lung cancer confirmed by histopathology                                                                              | 29-gene blood signature >80% sensitivity and specificity                                                                                                                                        |
| Gustafson AM<br>Sci Trans Med<br>2010 [79]<br>(20375364) | Bronchial brushings from airway epithelium                    | Affymetrix array                               | Bronchial airway brushings of cytologically normal epithelium from smokers with and without lung cancer or premalignancy                                                | Gene expression signature of PI3K signaling pathway activation was differentially expressed in airways of smokers with lung cancer or dysplasia and was reversible with chemopreventive therapy |
| Zander T<br>Clin Canc Res<br>2011 [88]<br>(21558400)     | Whole blood                                                   | Sentrix whole genome bead chips WG6 (Illumina) | PAXgene-stabilized blood samples from three independent groups consisting of NSCLC cases and controls                                                                   | Genes differentially expressed in whole blood of NSCLC patients and controls was used to build a diagnostic classifier with AUC >0.82                                                           |
| Zhang L<br>Cell Mol Life<br>2012 [85]<br>(22689099)      | Saliva                                                        | Affymetrix array                               | Whole saliva collected from untreated lung cancer patients with matched cancer-free controls                                                                            | 7 highly discriminatory transcriptomic salivary biomarker with AUC = 0.925 with >82% sensitivity and specificity                                                                                |
| <b>c) MicroRNA Biomarkers</b>                            |                                                               |                                                |                                                                                                                                                                         |                                                                                                                                                                                                 |
| Xing L<br>Mod Pathol<br>2010 [93]<br>(20526284)          | Sputum                                                        | RT-qPCR                                        | Sputum from squamous lung cancer patients and healthy controls                                                                                                          | Three miRNA diagnosed stage I squamous cell lung cancer with AUC 0.87                                                                                                                           |
| Yu L<br>Int J Cancer<br>2010 [94]<br>(21351266)          | Sputum                                                        | RT-qPCR                                        | Sputum from lung adenocarcinoma patients and healthy controls                                                                                                           | Four miRNA diagnosed stage I lung adenocarcinoma with AUC 0.90                                                                                                                                  |
| Foss KM<br>J Thorac Oncol<br>2011 [107]<br>(21258252)    | Serum                                                         | Genoexplorer microRNA expression system        | Serum from patients with lung cancer versus healthy controls                                                                                                            | Two miRNA discriminated individuals with early stages NSCLC with AUC 0.77                                                                                                                       |
| Bianchi F<br>EMBO Mol Med<br>2011 [103]<br>(21744498)    | Serum                                                         | Taqman Low Density Arrays RT-qPCR              | Serum from asymptomatic NSCLC patients and healthy smokers. Patients were screened by low doses CT and sera were collected at the time of diagnosis before the surgery. | 32 miRNA predicted risk of developing lung cancer in asymptomatic high-risk individuals with accuracy of 80%.                                                                                   |
| Boeri M<br>PNAS<br>2011 [109]<br>(21300873)              | Plasma                                                        | Taqman Low Density Arrays RT-qPCR              | Multiple plasma samples were collected before and at the time of disease, from two independent spiral CT-screening trials                                               | Fifteen miRNA predicted the risk of lung cancer with AUC 0.85 and 13 miRNA diagnosed lung cancer in undetermined CT nodules with AUC 0.88                                                       |
| Shen J<br>Lab Invest<br>2011 [110]<br>(21116241)         | Plasma                                                        | RT-qPCR                                        | Plasma from patients with lung cancer versus healthy controls                                                                                                           | Four miRNAs discriminated patients with NSCLC with AUC 0.93                                                                                                                                     |
| Chen X<br>Int J Cancer<br>2012 [105]<br>(21557218)       | Serum                                                         | RT-qPCR                                        | Serum from patients with lung cancer versus healthy controls                                                                                                            | Ten miRNAs discriminated patients with NSCLC with AUC 0.97                                                                                                                                      |
